# Supplementary material for: Improving the Performance of Direct Bonded Five-Junction Solar Cells by Optimization of AlInP Window Layer
Source: MDPI journal article supplement (doi:10.3390/photonics9060404), 2022-06-08
Supplement: s1 [file s1]

Archive with 1 entries (1 files):
- photonics-1728971-supplementary.pdf
