# Supplementary material for: Improving the Performance of Direct Bonded Five-Junction Solar Cells by Optimization of AlInP Window Layer
Source: MDPI journal article supplement (doi:10.3390/photonics9060404), 2022-06-08
Supplement: s1 [file s1 › photonics-1728971-supplementary.pdf]

# Improving the performance of direct bonded 5-junction solar cells by optimization of AlInP window layer

Ge Li <sup>1,2</sup>, Hongbo Lu <sup>1,2</sup>, Xinyi Li <sup>1,2</sup> and Wei Zhang <sup>1,2,\*</sup>

1 State Key Laboratory of Space power-sources, Shanghai, China

2 Shanghai Institute of Space Power-sources, Shanghai, China

\* Correspondence: ageli@163.net

## Supplementary Information

|             |                                                                                                          |        |
|-------------|----------------------------------------------------------------------------------------------------------|--------|
|             | n-GaAs substrate                                                                                         | 350μm  |
|             | etch stop                                                                                                | 100nm  |
|             | $1 \times 10^{19} \text{ cm}^{-3}$ n-GaAs contact                                                        | 300nm  |
| top cell    | $7 \times 10^{18} \text{ cm}^{-3}$ n- $\text{Al}_{0.5}\text{In}_{0.5}\text{P}$ window                    | 30nm   |
|             | $3 \times 10^{18} \text{ cm}^{-3}$ n- $\text{Al}_{0.18}\text{Ga}_{0.33}\text{In}_{0.49}\text{P}$ emitter | 20nm   |
|             | $5 \times 10^{16} \text{ cm}^{-3}$ p- $\text{Al}_{0.18}\text{Ga}_{0.33}\text{In}_{0.49}\text{P}$ base    | 450nm  |
|             | $5 \times 10^{17} \text{ cm}^{-3}$ p- $\text{Al}_{0.31}\text{Ga}_{0.2}\text{In}_{0.49}\text{P}$ BSF      | 100nm  |
|             | $\text{Al}_{0.3}\text{Ga}_{0.7}\text{As}/\text{Al}_{0.18}\text{Ga}_{0.33}\text{In}_{0.49}\text{P}$ TJ    | 30nm   |
| mid cell    | $\text{Al}_{0.23}\text{Ga}_{0.77}\text{As}$ subcell                                                      | 1200nm |
|             | $\text{Al}_{0.3}\text{Ga}_{0.7}\text{As}/\text{Al}_{0.05}\text{Ga}_{0.46}\text{In}_{0.49}\text{P}$ TJ    | 30nm   |
| bottom cell | $6 \times 10^{18} \text{ cm}^{-3}$ n- $\text{Al}_{0.5}\text{In}_{0.5}\text{P}$ window                    | 120nm  |
|             | $2 \times 10^{18} \text{ cm}^{-3}$ n-GaAs emitter                                                        | 100nm  |
|             | $1 \times 10^{17} \text{ cm}^{-3}$ p-GaAs base                                                           | 3500nm |
|             | $5 \times 10^{17} \text{ cm}^{-3}$ p- $\text{Al}_{0.16}\text{Ga}_{0.84}\text{As}$ BSF                    | 20nm   |
|             | $2 \times 10^{19} \text{ cm}^{-3}$ p-GaAs bonding                                                        | 50nm   |

Figure S1. Detailed cross-section structure of inverted GaAs T-3J sub-cell. The active region of each sub-cell consists of n-on-p junction (emitter/base) surrounded by n-type window layer and p-type BSF layer.

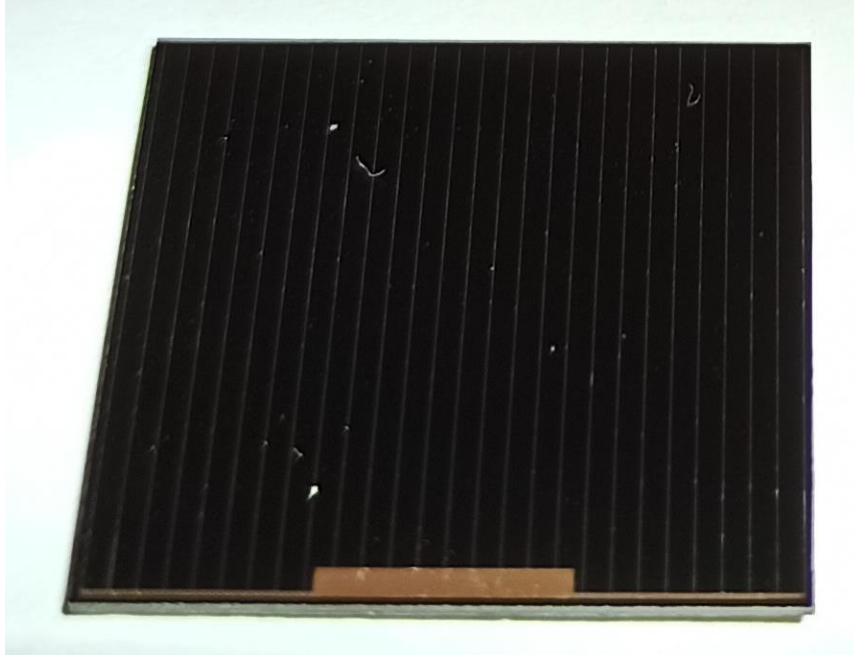

Figure S2. Photo of fabricated  $2.0 \times 2.0 \text{ cm}^2$  5J solar cell device.

|                     |                                     |                                                                                                      |        |
|---------------------|-------------------------------------|------------------------------------------------------------------------------------------------------|--------|
| 2.1 eV AlGaInP cell |                                     | n-GaAs substrate                                                                                     | 350μm  |
|                     |                                     | etch stop                                                                                            | 100nm  |
|                     | 1×10 <sup>19</sup> cm <sup>-3</sup> | n-GaAs contact                                                                                       | 300nm  |
|                     | 7×10 <sup>18</sup> cm <sup>-3</sup> | n-Al <sub>0.5</sub> In <sub>0.5</sub> P window                                                       | 30nm   |
|                     | 3×10 <sup>18</sup> cm <sup>-3</sup> | n-Al <sub>0.18</sub> Ga <sub>0.33</sub> In <sub>0.49</sub> P emitter                                 | 20nm   |
|                     | 5×10 <sup>16</sup> cm <sup>-3</sup> | p-Al <sub>0.18</sub> Ga <sub>0.33</sub> In <sub>0.49</sub> P base                                    | 450nm  |
|                     | 5×10 <sup>17</sup> cm <sup>-3</sup> | p-Al <sub>0.31</sub> Ga <sub>0.2</sub> In <sub>0.49</sub> P BSF                                      | 100nm  |
|                     |                                     | Al <sub>0.3</sub> Ga <sub>0.7</sub> As/Al <sub>0.18</sub> Ga <sub>0.33</sub> In <sub>0.49</sub> P TJ | 30nm   |
|                     | 6×10 <sup>18</sup> cm <sup>-3</sup> | n-Al <sub>0.5</sub> In <sub>0.5</sub> P window                                                       | 30nm   |
|                     | 2×10 <sup>18</sup> cm <sup>-3</sup> | n-Ga <sub>0.5</sub> In <sub>0.5</sub> P emitter                                                      | 40nm   |
| 1.7 eV AlGaAs cell  | 1×10 <sup>17</sup> cm <sup>-3</sup> | p-Al <sub>0.23</sub> Ga <sub>0.77</sub> As base                                                      | 1600nm |
|                     | 5×10 <sup>17</sup> cm <sup>-3</sup> | p-Ga <sub>0.5</sub> In <sub>0.5</sub> P BSF                                                          | 75nm   |
|                     | 2×10 <sup>19</sup> cm <sup>-3</sup> | p-GaAs bonding                                                                                       | 50nm   |
|                     |                                     |                                                                                                      |        |

Figure S3. Schematic cross-section structure of inverted AlGaInP/AlGaAs dual-junction solar cell. The 1.7 eV AlGaAs sub-cell is 400 nm thicker than T-3J structure to absorb enough light and make AlGaInP sub-cell current-limiting.
